# Supplementary material for: Treatment outcomes among snakebite patients in north-west Ethiopia—A retrospective analysis
Source: PubMed Central journal article supplement (PMC8863263; doi:10.1371/journal.pntd.0010148), 2022-02-09
Supplement: pntd.0010148.s001.pdf [file pntd.0010148.s001.pdf]

## Supplement 1

### Antivenom products used by Médecins Sans Frontières during the research period.

| Brand name                                | Company        | Country of production | Raised against venom of species                                                                                                                                                                                                                                                                                                                                                                                              | Period of use by Médecins Sans Frontières |
|-------------------------------------------|----------------|-----------------------|------------------------------------------------------------------------------------------------------------------------------------------------------------------------------------------------------------------------------------------------------------------------------------------------------------------------------------------------------------------------------------------------------------------------------|-------------------------------------------|
| Fav-Afrique                               | Sanofi-Pasteur | France                | <i>Bitis arietans</i> , <i>B. gabonica</i> , <i>Dendroaspis jamesoni</i> , <i>D. polylepis</i> , <i>D. viridis</i> , <i>Echis leucogaster</i> , <i>E. ocellatus</i> , <i>Naja haje</i> , <i>N. melanoleuca</i> , <i>N. nigricollis</i>                                                                                                                                                                                       | March 2015 – August 2016                  |
| Snake Venom Antiserum Polyvalent (equine) | VACSERA        | Egypt                 | <i>Bitis arietans</i> , <i>B. gabonica</i> , <i>Cerastescerastes</i> , <i>C. vipera</i> , <i>Echis carinatus</i> , <i>E. coloratus</i> , <i>Macrovipera lebetina</i> , <i>M. palestinae</i> , <i>Naja haje</i> , <i>N. melanoleuca</i> , <i>N. mossambica</i> , <i>N. nigricollis</i> , <i>N. oxiana</i> , <i>Pseudocerastes persicus</i> , <i>Vipera ammodytes</i> , <i>Vipera xanthina</i> , <i>Walterinnesia aegyptia</i> | January 2017 – August 2018                |
| EchiTabPlus                               | ICP            | Costa Rica            | <i>Bitis arietans</i> , <i>Echis ocellatus</i> , <i>Naja nigricollis</i>                                                                                                                                                                                                                                                                                                                                                     | September 2018 – present                  |
| SAIMR Polyvalent                          | SAVP           | South Africa          | <i>Bitis arietans</i> , <i>B. gabonica</i> , <i>Dendroaspis angusticeps</i> , <i>D. jamesoni</i> , <i>D. polylepis</i> , <i>Hemachatus haemachatus</i> , <i>Naja annulifera</i> , <i>N. melanoleuca</i> , <i>N. mossambica</i> , <i>N. nivea</i>                                                                                                                                                                             | September 2018 – present                  |
