# Supplementary material for: Treatment outcomes among snakebite patients in north-west Ethiopia—A retrospective analysis
Source: PubMed Central journal article supplement (PMC8863263; doi:10.1371/journal.pntd.0010148), 2022-02-09
Supplement: pntd.0010148.s002.pdf [file pntd.0010148.s002.pdf]

## Supplement 4

### Odds of adverse outcome in snakebite patients treated with different antivenoms at Abdurafi field hospital between 2015 and 2019.

|                                       |        | Adverse outcome (%) | Odds ratio (95% CI) | p-value | Adjusted odds ratio*** (95% CI) | p-value |
|---------------------------------------|--------|---------------------|---------------------|---------|---------------------------------|---------|
| Antivenom                             |        |                     |                     |         |                                 |         |
| Fav-Afrique                           |        | 10/148* (6.8%)      | 1.00 (reference)    |         |                                 |         |
| VacSera                               |        | 42/164 (25.6%)      | 4.72 (2.27 - 9.80)  | <0.001  | 6.16 (2.64 - 14.4)              | <0.001  |
| EchiTAb-PLUS-ICP                      |        | 15/155** (9.7%)     | 1.47 (0.64 - 3.38)  | 0.367   | 2.99 (1.12 - 8.00)              | 0.029   |
| Age (per year)                        |        |                     | 1.00 (0.97 - 1.02)  | 0.818   | 0.99 (0.97 - 1.02)              | 0.617   |
| Gender                                | Male   | 62/414 (15.0%)      | 1.00 (reference)    |         | 1.00 (reference)                | 0.373   |
|                                       | Female | 5/52 (9.6%)         | 0.60 (0.23 - 1.58)  | 0.304   | 0.62 (0.22 - 1.77)              |         |
| Time from bite to admission (per day) |        |                     | 1.01 (1.00 - 1.02)  | 0.159   | 1.01 (1.00 - 1.02)              | 0.280   |
| Signs of severe envenomation          |        | 37/402 (9.2%)       | 1.00 (reference)    |         | 1.00 (reference)                |         |
|                                       |        | 30/64 (46.9%)       | 8.70 (4.80 - 15.8)  | <0.001  | 8.84 (4.38 - 17.8)              | <0.001  |
| Body part bitten                      | Foot   | 45/291 (15.5%)      | 1.00 (reference)    | 0.911   | 1.00 (reference)                | 0.859   |
|                                       | Leg    | 3/30 (10.0%)        | 0.61 (0.18 - 2.09)  |         | 1.07 (0.27 - 4.21)              |         |
|                                       | Hand   | 16/123 (13.0%)      | 0.82 (0.44 - 1.51)  |         | 1.09 (0.54 - 2.21)              |         |
|                                       | Arm    | 1/7 (14.3%)         | 0.91 (0.11 - 7.75)  |         | 3.05 (0.27 - 33.9)              |         |
|                                       | Other  | 2/15 (13.3%)        | 0.84 (0.18 - 3.85)  |         | 2.12 (0.42 - 10.7)              |         |
| Heart rate (per bpm)                  |        |                     | 1.01 (1.00 - 1.03)  | 0.044   | 1.01 (1.00 - 1.03)              | 0.162   |
| Temperature on admission (per °C)     |        |                     | 0.99 (0.85 - 1.16)  | 0.943   | 1.01 (0.84 - 1.22)              | 0.922   |

\* excluding one patient who defaulted treatment (discharged against medical advice)

\*\* excluding one patient who had missing data for heart rate

\*\*\* adjusted for age, sex, and time from bite until admission (*a priori*) and signs of severe envenomation (associated with outcome and antivenom in univariate analyses), body part bitten (associated with type of antivenom in univariate analysis), heart rate and temperature on admission (associated with outcome and antivenom in non-parametric tests)
