# Supplementary material for: Treatment outcomes among snakebite patients in north-west Ethiopia—A retrospective analysis
Source: PubMed Central journal article supplement (PMC8863263; doi:10.1371/journal.pntd.0010148), 2022-02-09
Supplement: pntd.0010148.s003.pdf [file pntd.0010148.s003.pdf]

## Supplement 5

### Odds of treatment reaction and death in snakebite patients treated with different antivenoms at Abdurafi field hospital between 2015 and 2019.

|                                       | n    | Outcome (%)        | Odds ratio (95% CI) | p-value | Adjusted odds ratio** (95% CI) | p-value |
|---------------------------------------|------|--------------------|---------------------|---------|--------------------------------|---------|
| Antivenom                             |      | Treatment reaction |                     |         |                                |         |
| Fav-Afrique                           | 148* | 2 (1.4%)           | 1.00 (reference)    |         |                                |         |
| VacSera                               | 164  | 30 (18.3%)         | 16.3 (3.83 - 69.7)  | <0.001  | 16.2 (3.79 - 69.2)             | <0.001  |
| EchiTAb-PLUS-ICP                      | 156  | 11 (7.1%)          | 5.54 (1.21 - 25.4)  | 0.028   | 5.78 (1.25 - 26.7)             | 0.024   |
| Age (per year)                        |      |                    | 0.98 (0.95 - 1.01)  | 0.220   | 0.98 (0.95 - 1.01)             | 0.241   |
| Gender (female v male)                |      |                    | 0.79 (0.27 - 2.30)  | 0.661   | 0.77 (0.25 - 2.31)             | 0.638   |
| Time from bite to admission (per day) |      |                    | 0.99 (0.97 - 1.01)  | 0.175   | 0.99 (0.97 - 1.01)             | 0.265   |
| Antivenom                             |      | Death              |                     |         |                                |         |
| Fav-Afrique                           | 148* | 2 (1.4%)           | 1.00 (reference)    |         |                                |         |
| VacSera                               | 164  | 8 (4.9%)           | 3.74 (0.78 - 17.9)  | 0.097   | 4.56 (0.90 - 23.0)             | 0.066   |
| EchiTAb-PLUS-ICP                      | 156  | 3 (1.9%)           | 1.43 (0.24 - 8.69)  | 0.697   | 1.16 (0.18 - 7.34)             | 0.871   |
| Age (per year)                        |      |                    | 1.06 (1.01 - 1.10)  | 0.009   | 1.06 (1.02 - 1.11)             | 0.008   |
| Gender (female v male)                |      |                    | 0.65 (0.08 - 5.07)  | 0.677   | 0.64 (0.08 - 5.22)             | 0.677   |
| Time from bite to admission (per day) |      |                    | 1.01 (1.00 - 1.03)  | 0.097   | 1.02 (1.00 - 1.03)             | 0.060   |

\* excluding one patient who defaulted treatment (discharged against medical advice)

\*\* adjusted for all variables in table
