# Supplementary material for: Treatment outcomes among snakebite patients in north-west Ethiopia—A retrospective analysis
Source: PubMed Central journal article supplement (PMC8863263; doi:10.1371/journal.pntd.0010148), 2022-02-09
Supplement: pntd.0010148.s004.pdf [file pntd.0010148.s004.pdf]

## **MSF Snakebite Patient Form**

Snakebite ID number \_\_\_\_\_ MSF file number \_\_\_\_\_ Age \_\_\_\_\_ (Y/M)

Surname \_\_\_\_\_ First name \_\_\_\_\_ Sex M  F

**Snakebite time** Date \_\_/\_\_/\_\_ Time \_\_:\_\_

Local practitioner consultation Date \_\_/\_\_/\_\_ Time \_\_:\_\_

**MSF Consultation/Admission** Date \_\_/\_\_/\_\_ Time \_\_:\_\_

Part of body bitten : foot , leg , hand , arm , trunk , face ; left  right

Location of bite (village) : \_\_\_\_\_ indoors , compound ; field ; road ; tree ; river

**Context:** sleeping , playing , walking , working , cutting grass , toilet ;

**Snake description:** size small <1m  large >1m , black  brown  green  diamond pattern

Suspected species : \_\_\_\_\_ (check photo album)  snake not seen

**Initial Presentation :**

|         |              |         |              |
|---------|--------------|---------|--------------|
| HR ____ | BP ____/____ | T° ____ | CRT ____ sec |
|---------|--------------|---------|--------------|

1. **Cytotoxic:** Local swelling (not progressive)  Progressive swelling (>1joint) ; necrosis
2. **Haemotoxic:** Spontaneous bleeding  20 min WBCT Non-clotting  clotting  not done
3. **Neurotoxic:** Ptosis (droopy eyes) , diplopia , blurred vision , difficulty talking , swallowing , breathing , confusion  needs oxygen  (SaO2 \_\_\_\_%)
4. **For all:** BP \_\_/\_\_; Shock Yes  No  // Conscious  Unconscious  (no response to pain)

**Antivenom:** **Not needed** , Fav-Afrique , EchiTabPlus , SAIMR/SAVP , other

1<sup>st</sup> treatment # Vials used: \_\_\_\_\_ date \_\_/\_\_/\_\_ time \_\_:\_\_

If need: 2<sup>nd</sup> treatment # Vials used: \_\_\_\_\_ date \_\_/\_\_/\_\_ time \_\_:\_\_

3<sup>rd</sup>  date \_\_/\_\_/\_\_ time \_\_:\_\_ More ? (explain) \_\_\_\_\_

Time of improvement start: date \_\_/\_\_/\_\_ time \_\_:\_\_ Time of cure: date \_\_/\_\_/\_\_ time \_\_:\_\_

**Adverse reactions:** skin itchy rash (urticarial/hives) ; abdominal pain ; vomiting ; difficulty breathing-stridor  asthma-wheezing  hypotension (BP \_\_/\_\_)  shock ; High Temp >38° ;

Time of 1<sup>st</sup> adverse reaction Date \_\_/\_\_/\_\_ Time \_\_:\_\_

Delayed reaction (joint pain & fever) Date \_\_/\_\_/\_\_ Time \_\_:\_\_

Other treatments: IV Ringer infusion  adrenalin  antihistaminic  other  \_\_\_\_\_

**Complications:** Severe necrosis+disability ; Amputation ; Anxiety-PTSD ; other \_\_\_\_\_

**MSF Discharge:** Date \_\_/\_\_/\_\_ Time \_\_:\_\_

**Final diagnostic:** 1. cured  2. cured with sequelae  3. death  4. defaulted
